# Supplementary material for: Electrocatalytic oxidation of n-propanol to produce propionic acid using an electrocatalytic membrane reactor
Source: Royal Society of Chemistry journal article supplement (doi:10.1039/c3cc41181h), 2013-01-01
Supplement: c3cc41181h.pdf [file c3cc41181h.pdf]

# Supporting Information

For

## Electrocatalytic oxidation of n-propanol to produce propionic acid by an electrocatalytic membrane reactor

*Jiao Li,<sup>a</sup> Jianxin Li,<sup>\*a</sup> Hong Wang,<sup>a</sup> Bowen Cheng,<sup>a</sup> Benqiao He,<sup>a</sup> Feng Yan,<sup>a</sup> Yang Yang,<sup>a</sup> Wenshan Guo<sup>b</sup> and Huu Hao Ngo<sup>b</sup>*

<sup>a</sup>State Key Laboratory of Hollow Fiber Membrane Materials and Processes, School of Materials Science and Engineering, Tianjin Polytechnic University, Tianjin 300387, P. R. China

<sup>b</sup>Centre for Technology in Water and Wastewater, School of Civil and Environmental Engineering, University of Technology Sydney, PO Box 123 Broadway, NSW 2007, Australia

\*E-mail: [jxli0288@yahoo.com.cn](mailto:jxli0288@yahoo.com.cn) or [jxli@tjpu.edu.cn](mailto:jxli@tjpu.edu.cn) (J. Li);

## Table of Contents:

**Page S3:** Experimental Section.

**Page S5:** The conversion of n-propanol at different working potential (Table S1) and GC-MS analysis of feed and permeate (Table S2).

**Page S6:** The carbon balance before and after electrocatalytic reaction at different residence time and temperature (Table S3).

**Page S7:** The instantaneous flow rate at different residence time (Table S4).

**Page S8:** High-resolution TEM images of MnO<sub>2</sub> power (Figure S1).

**Page S9:** XRD data for MnO<sub>2</sub> catalyst and MnO<sub>2</sub>/Ti membrane (Figure S2).

**Page S11:** XPS data for MnO<sub>2</sub>/Ti membrane (Figure S3).

**Page S12:** EIS of Ti and MnO<sub>2</sub>/Ti membrane (Figure S4).

**Page S13:** GC-MS spectrometer (Figure S5).

**Page S16:** Conversion of n-propanol and selectivity to propionic acid versus reaction time in the reactor at the residence time of 0 min (Figure S6).

**Page S17:** Proposed mechanism of electrochemical oxidation of n-propanol to produce propionic acid using MnO<sub>2</sub>/Ti electrocatalytic membrane (Figure S7).

**Page S19:** Cyclic voltammograms obtained in 0.1 M Na<sub>2</sub>SO<sub>4</sub> solution at different membranes (Figure S8).

**Page S20:** References.

## Experimental Section

**Preparation and characterization of MnO<sub>2</sub>/Ti membrane.** Commercially available tubular porous conductive Ti membrane with an average pore size of 10.8 μm, ID/OD=19 mm/28.5 mm and specific surface area of 230 m<sup>2</sup>/g was used as the substrate. The membrane with the filtration area of 52.2 cm<sup>2</sup> was first pretreated in 10 wt.% boiled oxalic acid solution for 1 h, then was cleaned with large amounts of deionized water and dried at room temperature. Secondly, the membrane was dipped into 50 wt.% Mn(NO<sub>3</sub>)<sub>2</sub> solution for 0.5 h and then dried at room temperature. Afterwards, the treated membrane was placed in a tube furnace to sinter at the designed temperature for 2 h. Finally, a functional nano-MnO<sub>2</sub> loading Ti membrane (MnO<sub>2</sub>/Ti electrocatalytic membrane) was obtained with the MnO<sub>2</sub> loading of 3.6 wt.% (The weight of the substrate is 69.26 g). The morphologies and structures of the membrane were observed by FESEM (Hitachi S-4800, Japan), EDS (GENESIS 60S), HRTEM (JEM-2100) and XPS (ThermoFisher K-Alpha). XRD patterns were obtained using D/MAX-2500 (Cu K<sub>α</sub> λ= 1.5406Å). EIS was performed using a Electrochemical workstation (ZAHNER Zennium).

**Electrochemical synthesis of propionic acid from n-propanol.** Propionic acid and propanal would appear in both feed and permeate during the synthesis of propionic acid from n-propanol by the ECMR.

The conversion for reactant n-propanol within a period of reaction time can be described as Equation (S1):<sup>[S1]</sup>

$$\% \text{ Conversion of n-propanol} = \frac{(x_{F-OH} \cdot V_F) - (x_{P-OH} \cdot V_P) - (x_{R-OH} \cdot V_R)}{(x_{F-OH} \cdot V_F) - (x_{R-OH} \cdot V_R)} \times 100\% \quad (\text{S1})$$

The selectivity for product - propionic acid in both feed and permeate within a period of reaction time can be expressed as Equation (S2):<sup>[S2]</sup>

$$\% \text{ Selectivity of propionic acid} = \frac{(x_{P-COOH} \cdot V_P) + (x_{R-COOH} \cdot V_R)}{(x_{F-OH} \cdot V_F) - (x_{P-OH} \cdot V_P) - (x_{R-OH} \cdot V_R)} \times 100\% \quad (\text{S2})$$

where  $x_{F-OH}$  is the initial molar fraction of n-propanol in the feed (mmol/L),  $V_F$  is the initial volume of the feed (L);  $x_{P-OH}$  and  $x_{R-OH}$  are the molar fraction of n-propanol in permeate and in the residual solution in the feed tank (mmol/L);  $V_P$  and  $V_R$  are the volume of the permeate and the residual solution in the feed tank (L);  $x_{P-COOH}$  and  $x_{R-COOH}$  are the molar fraction of propionic acid in the permeate and the residual solution (mmol/L).

The reactant, the intermediates and the product were analyzed with GC-MS system (Agilent 6890N-5975C) equipped with a HP-5MS column (30.0 m × 0.25 mm). The concentration of the targeted components was determined by GC (Agilent GC-6890N) with a FFAP column (30.0 m × 0.25 mm).

**Table S1** The conversion of n-propanol at different working potential.

|                                  |       |      |      |      |      |
|----------------------------------|-------|------|------|------|------|
| The working potential (V)        | 2.56  | 2.67 | 2.78 | 2.86 | 3.12 |
| The conversion of n-propanol (%) | 66.55 | 70.8 | 77.1 | 73.2 | 71.8 |

The operation voltage was 2.5 V and the reaction temperature was 25 °C at 22.55 min of residence time, respectively. It was found from Table S1 that the conversion of n-propanol increased from 66.55% to 77.1% with the working potential increased from 2.56 V to 2.78 V, and then decreased to 71.8% when the working potential further increased to 3.12 V.

It also could be seen from the above experiment that the operating current also increased from 61 mA to 120 mA with the increase of the potential from 2.56 V to 2.78 V. The larger current generated between anode and the cathode would produce the more electrogenerated intermediate,<sup>[S3]</sup> leading to the increasing conversion. However, when the operating potential was more than 2.78 V, water decomposition would compete with n-propanol oxidation. As a result, some of the applied energy is consumed by water decomposition instead of the oxidation of n-propanol, which resulted in a lower conversion. Therefore, the working potential of 2.8 V was chose in this paper according to the above observations.

**Table S2 a)** The qualitative analysis of n-propanol in the feed

| PK | Area Pct | Library/ID |
|----|----------|------------|
| 1  | 1.817    | 1-Propanol |

**Table S2 b)** Composition analysis of the permeate in the ECMR operation

| PK | Area Pct | Library/ID                   |
|----|----------|------------------------------|
| 1  | 1.813    | 1-Propanol                   |
| 2  | 1.597    | Propanal                     |
| 3  | 4.065    | Propionic acid               |
| 4  | 4.493    | Propinoic acid, propyl ester |

**Table S3** The carbon balance before and after electrocatalytic reaction at different residence time and temperature.

| Residence time (min) | Reaction temperature (°C) | $n_{OH-0}$<br>(mmol) | $n_{OH-1}$<br>(mmol) | $n_{COOH-1}$<br>(mmol) | $n_{CHO-1}$<br>(mmol) | $\Delta n$<br>(mmol) |
|----------------------|---------------------------|----------------------|----------------------|------------------------|-----------------------|----------------------|
| 0                    | 25                        | 166.22               | 138.86               | 4.19                   | 1.34                  | 21.83                |
| 0.54                 | 25                        | 156.04               | 129.93               | 9.23                   | 11.55                 | 5.33                 |
| 3.22                 | 25                        | 152.08               | 110                  | 16.64                  | 16.58                 | 8.86                 |
| 5.84                 | 25                        | 150.77               | 96.81                | 22.09                  | 22.14                 | 9.73                 |
| 11.83                | 25                        | 165.17               | 94.57                | 37.68                  | 21.83                 | 11.09                |
| 15.47                | 25                        | 165.62               | 80.43                | 49.93                  | 22.71                 | 12.55                |
| 18.68                | 25                        | 150.92               | 60.02                | 61.41                  | 16.16                 | 13.33                |
| 22.55                | 25                        | 167.66               | 38.18                | 110.58                 | 9.78                  | 9.12                 |
| 22.55                | 50                        | 163.57               | 2.59                 | 157.5                  | 2.63                  | 0.85                 |

$n_{OH-0}$  was the amount of n-propanol before reaction (mmol);  $n_{OH-1}$  was the amount of n-propanol in the feed and permeate after the reaction time 75 min (mmol);  $n_{COOH-1}$  and  $n_{CHO-1}$  were the amount of propionic acid and propanal in the feed and permeate after the reaction time 75 min (mmol).

$\Delta n$  can be described as the following equation:

$$\Delta n = n_{OH-0} - n_{OH-1} - n_{COOH-1} - n_{CHO-1} \quad (S1)$$

The value of  $\Delta n$  represented the amount of n-propanol mineralized completely into carbon dioxide and water and/or used to react with acid to produce propyl propionate by esterification during the ECMR operation. It can be found from Table S2 that the value of  $\Delta n$  at residence time 0 min was 21.83, which was larger than those obtained at other residence times (0.85~13.33). This result indicated that propionic acid can be easily oxidized to  $CO_2$  and  $H_2O$  at the residence time of 0 min owing to the limit of mass transfer.

**Table S4** The instantaneous flow rate at different residence time.

| Residence time (min) | Instantaneous permeate (mL/min) |
|----------------------|---------------------------------|
| 0.54                 | 5.00                            |
| 3.22                 | 0.83                            |
| 5.84                 | 0.46                            |
| 11.83                | 0.23                            |
| 15.47                | 0.17                            |
| 18.68                | 0.14                            |
| 22.55                | 0.12                            |

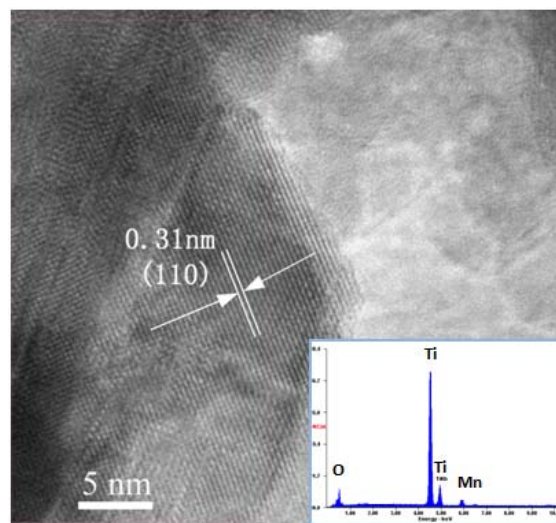

**Fig.S1** High-resolution TEM images of MnO<sub>2</sub> power.



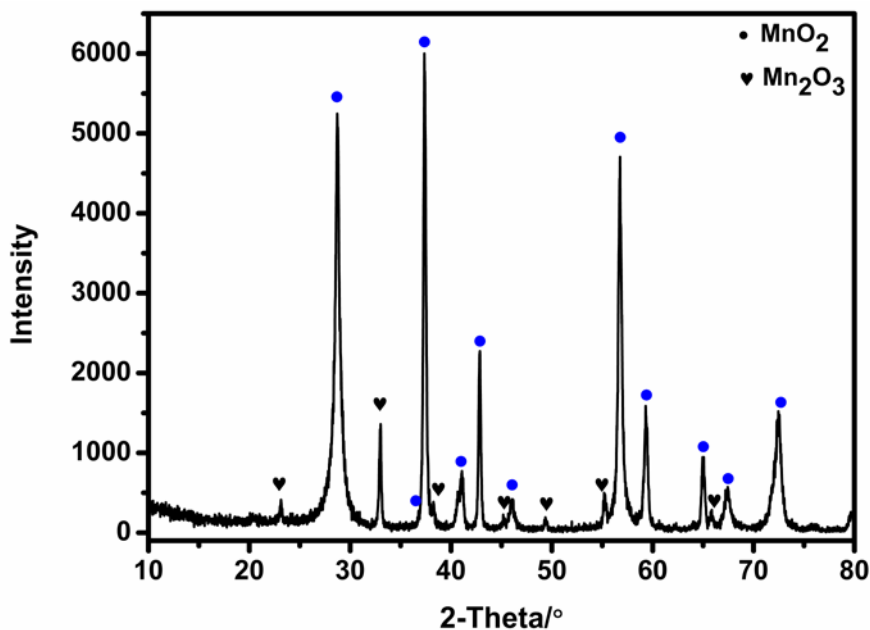

**Figure S2-1.** X-ray diffraction pattern of the synthesized MnO<sub>2</sub> obtained at 350°C.

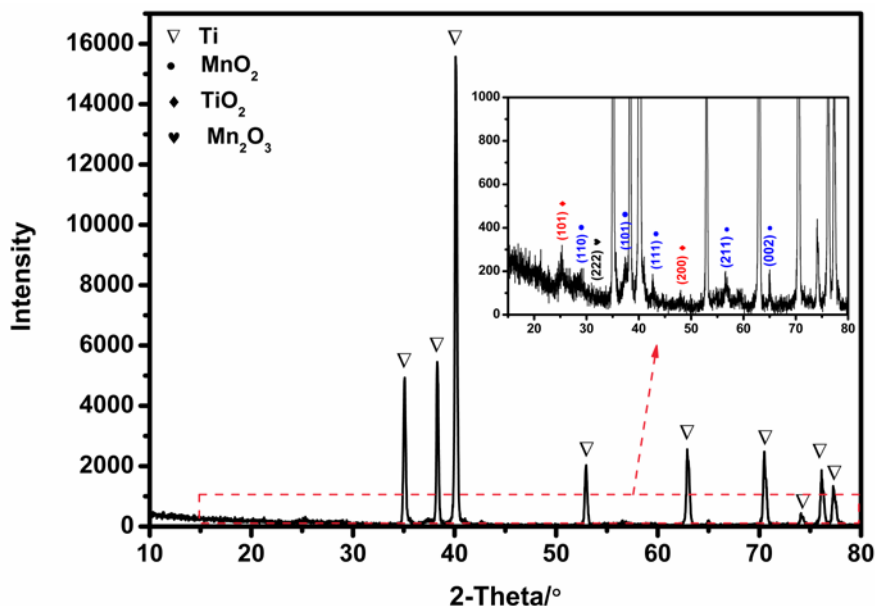

**Figure S2-2.** X-ray diffraction pattern of the MnO<sub>2</sub>/Ti membrane.

As shown in Figure S1-1, the representative peaks of MnO<sub>2</sub> particles observed located at  $2\theta=28.68^\circ$ ,  $37.33^\circ$ ,  $41.01^\circ$ ,  $42.82^\circ$ ,  $46.08^\circ$ ,  $56.65^\circ$ ,  $59.37^\circ$ ,  $64.83^\circ$  and  $72.38^\circ$ , which were characteristic peaks of the pyrolusite-MnO<sub>2</sub> crystals (JCPDS No. 24-0735). It also can be seen from Figure S1-1 that some weak small diffraction peaks appeared at  $2\theta=23.13^\circ$ ,  $32.95^\circ$ ,  $38.23^\circ$ ,  $45.18^\circ$ ,  $49.35^\circ$ ,  $55.189^\circ$  and  $65.806^\circ$ , which can be indexed to the Bixbyite-C-Mn<sub>2</sub>O<sub>3</sub> crystals (JCPDS No. 41-1442). The average

crystal size of the obtained particles was calculated by Scherer's formula:  $D = k\lambda / \beta \cos\theta$ , where  $D$  is the average crystal diameter,  $k$  is a constant of 0.89,  $\lambda$  is the radiation wavelength of 0.154 nm,  $\beta$  is full width at half-maximum of diffraction peak, and  $\theta$  is the Bragg angle of approximately 22.7 nm. X-ray diffraction pattern of the MnO<sub>2</sub> loading Ti (MnO<sub>2</sub>/Ti) electrocatalytic membrane was also presented in Figure S1-2. Except for the obvious peaks of Ti crystals, there were also corresponding peaks of the pyrolusite-MnO<sub>2</sub> crystals and the Bixbyite-C-Mn<sub>2</sub>O<sub>3</sub> crystals. In addition, the diffraction peaks of TiO<sub>2</sub> crystals observed at  $2\theta = 25.28^\circ$ ,  $48.05^\circ$ , were identified to the anatase phase (JCPDS No. 21-1272).

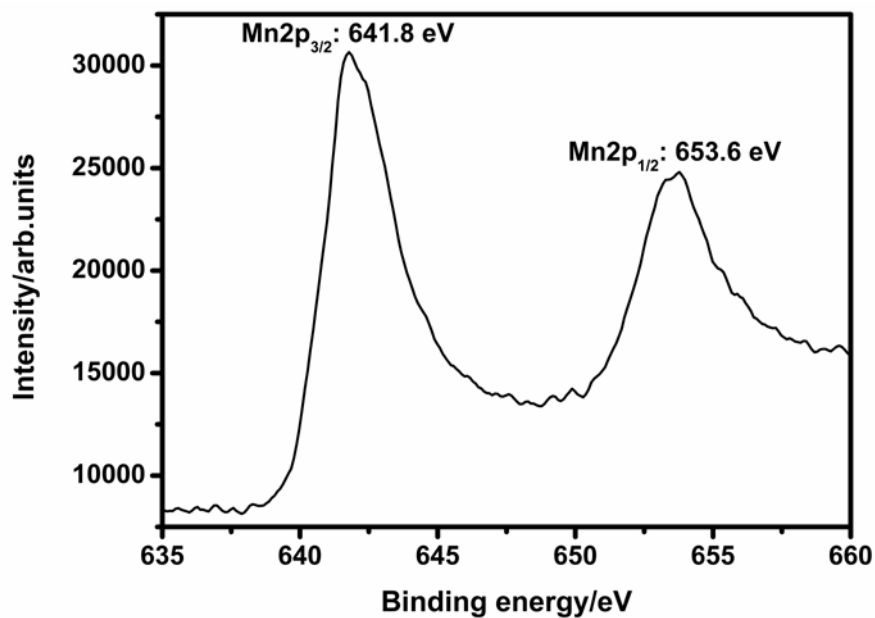

**Figure S3.** XPS spectra of the MnO<sub>2</sub>/Ti membrane. The binding energy of Mn 2p<sub>3/2</sub> and 2p<sub>1/2</sub> were 641.8 and 653.6 eV, respectively. The different binding energy between Mn 2p<sub>3/2</sub> and 2p<sub>1/2</sub> was 11.8 eV. It revealed that the valence state of Mn was 4+. The results obtained are in good agreement with the reported data of Mn 2p<sub>3/2</sub> and 2p<sub>1/2</sub> in MnO<sub>2</sub>.<sup>[S4]</sup>

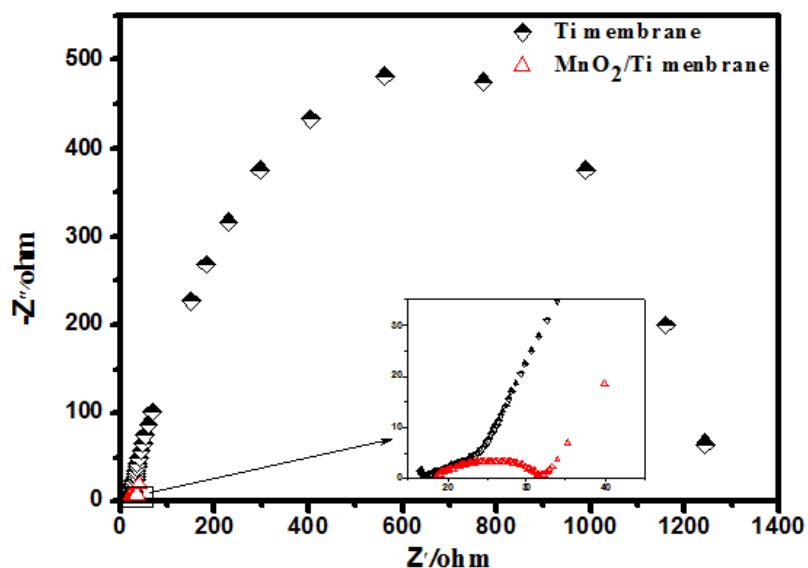

**Figure S4.** Electrochemical impedance spectra (EIS) of Ti and MnO<sub>2</sub>/Ti membrane. It depicts the electrochemical performance of the MnO<sub>2</sub>/Ti membrane measured by EIS (amplitude of 10 mV, frequency range of 0.5 mHz to 100 kHz, in 0.1 M H<sub>2</sub>SO<sub>4</sub> solution). It can be seen from Figure S3 that the EIS Nyquist plot included the semicircle and straight-line parts. The charge-transfer resistance (RCT) was equal to the diameter of the semicircle on the EIS Nyquist plot. The smaller the arc radius of an EIS nyquist plot, the higher the efficiency of charge separation was. The radius of semicircle in the high frequency range obtained from the MnO<sub>2</sub>/Ti electrode was  $2.36 \Omega \cdot \text{cm}^{-2}$ , which was much smaller than that of the Ti membrane ( $10.27 \Omega \cdot \text{cm}^{-2}$ ). This result suggested that the enhanced electronic conductivity of MnO<sub>2</sub>/Ti electrode was attributed to the special energy band structure of MnO<sub>2</sub> crystals.

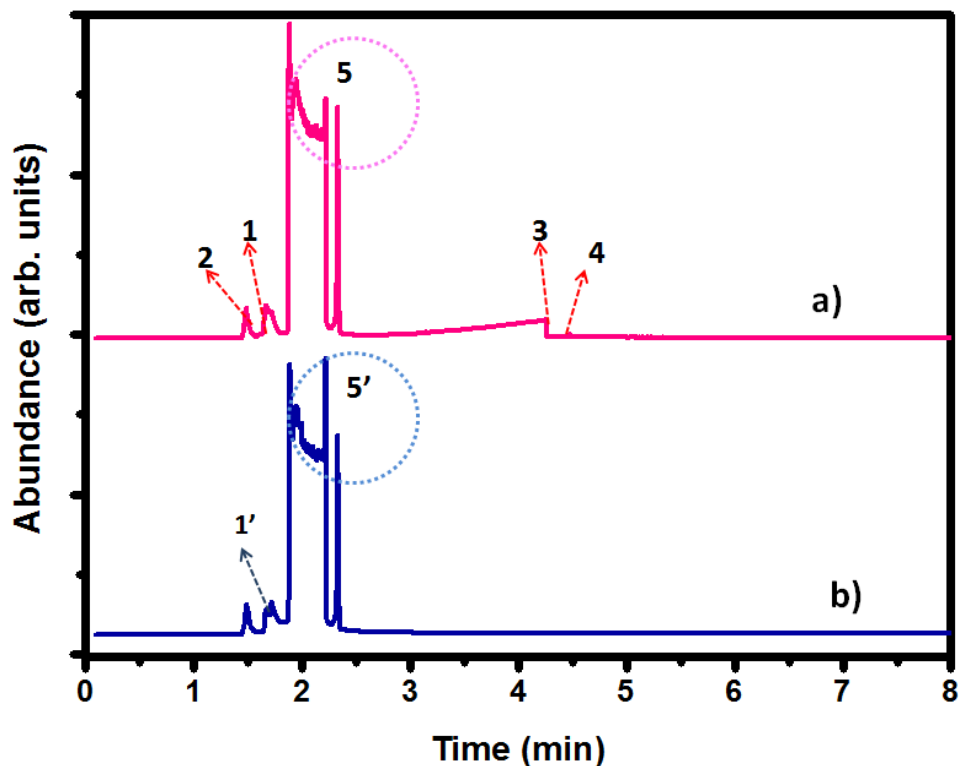

**Figure S5.** Gas chromatography-mass spectrometer (GC-MS) analysis: a) permeate; b) n-propanol in the feed. Methylene chloride and trichloromethane also appeared in the feed and the permeate (peaks 5 and 5') because they were used as the cleaner and extraction agent, respectively. According to Table S1b, the feed only had n-propanol. Propanal, propionic acid and a small amount of propyl propionate except for n-propanol appeared in the permeate were the product, intermediate product and by-product of electrocatalytic oxidation of n-propanol, respectively (Table S1a).

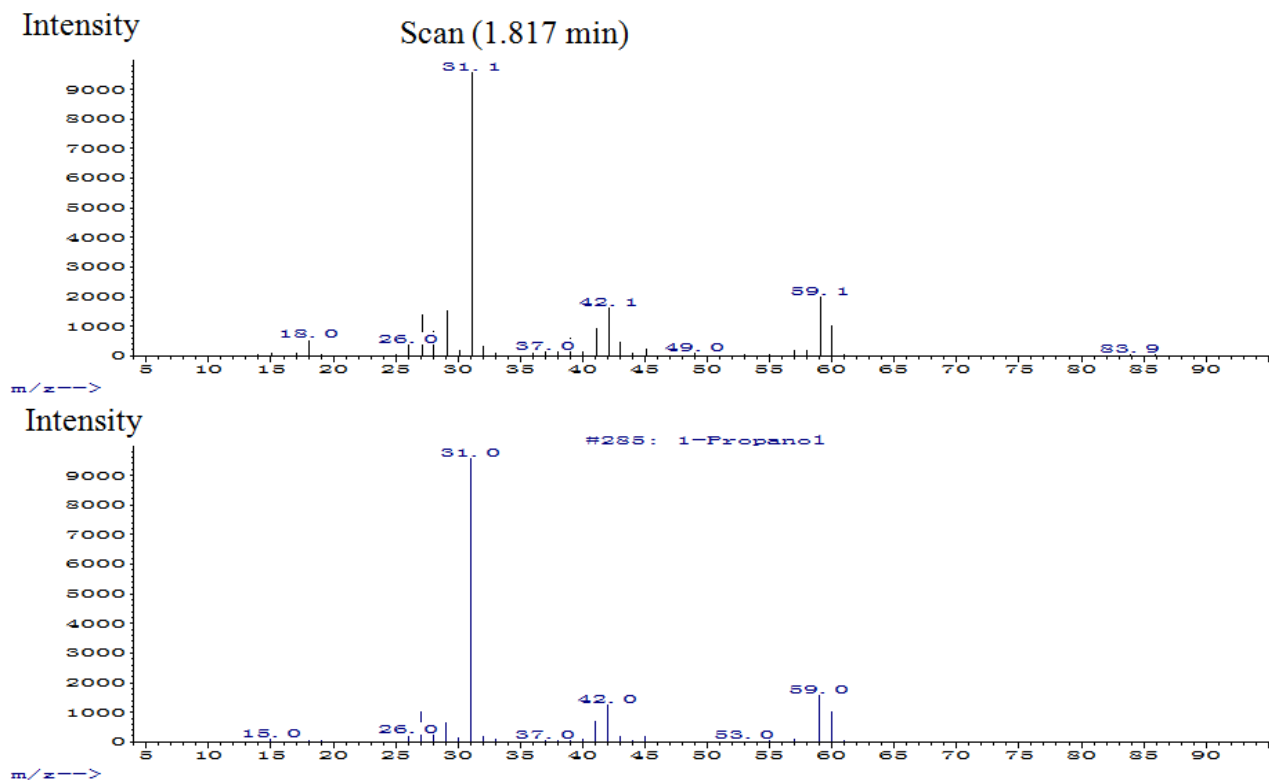

**Figure S5-1.** The Mass Spectra of n-propanol in the feed.

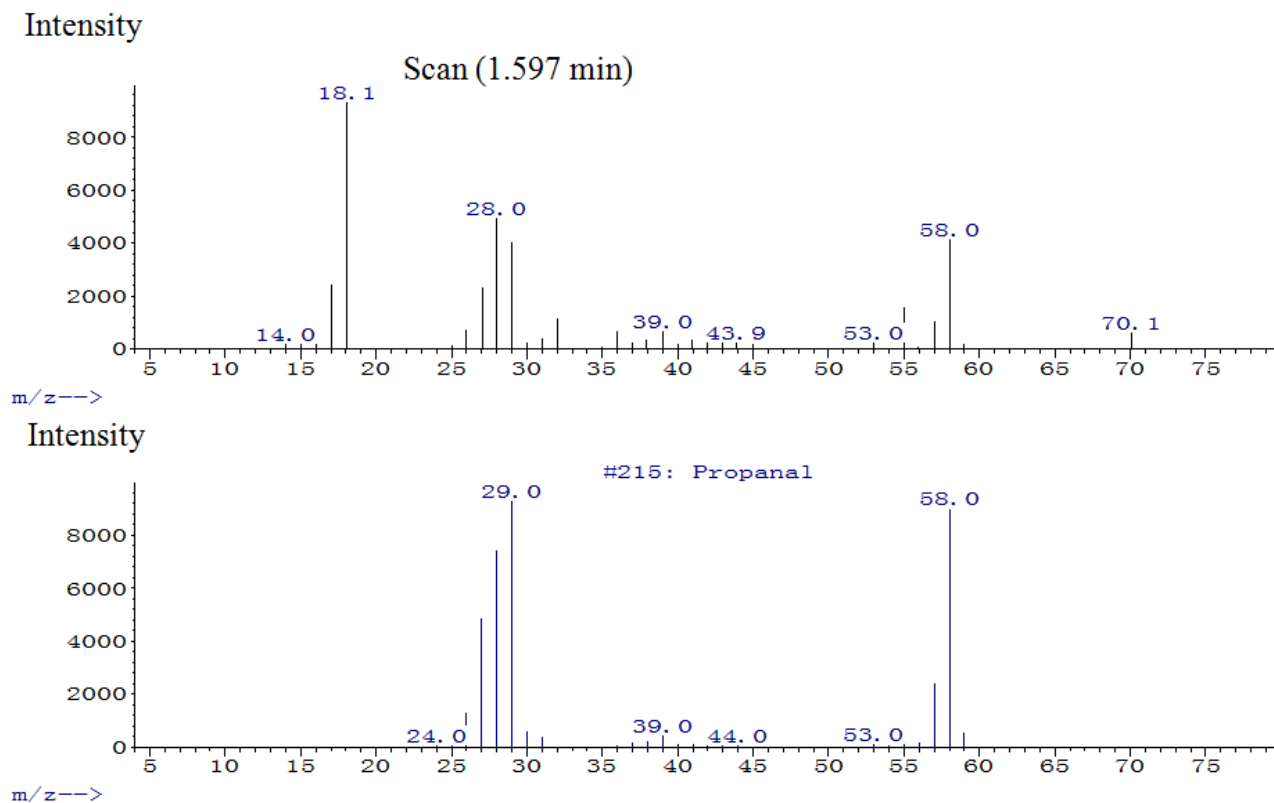

**Figure S5-2.** The Mass Spectra of propanal in the permeate.

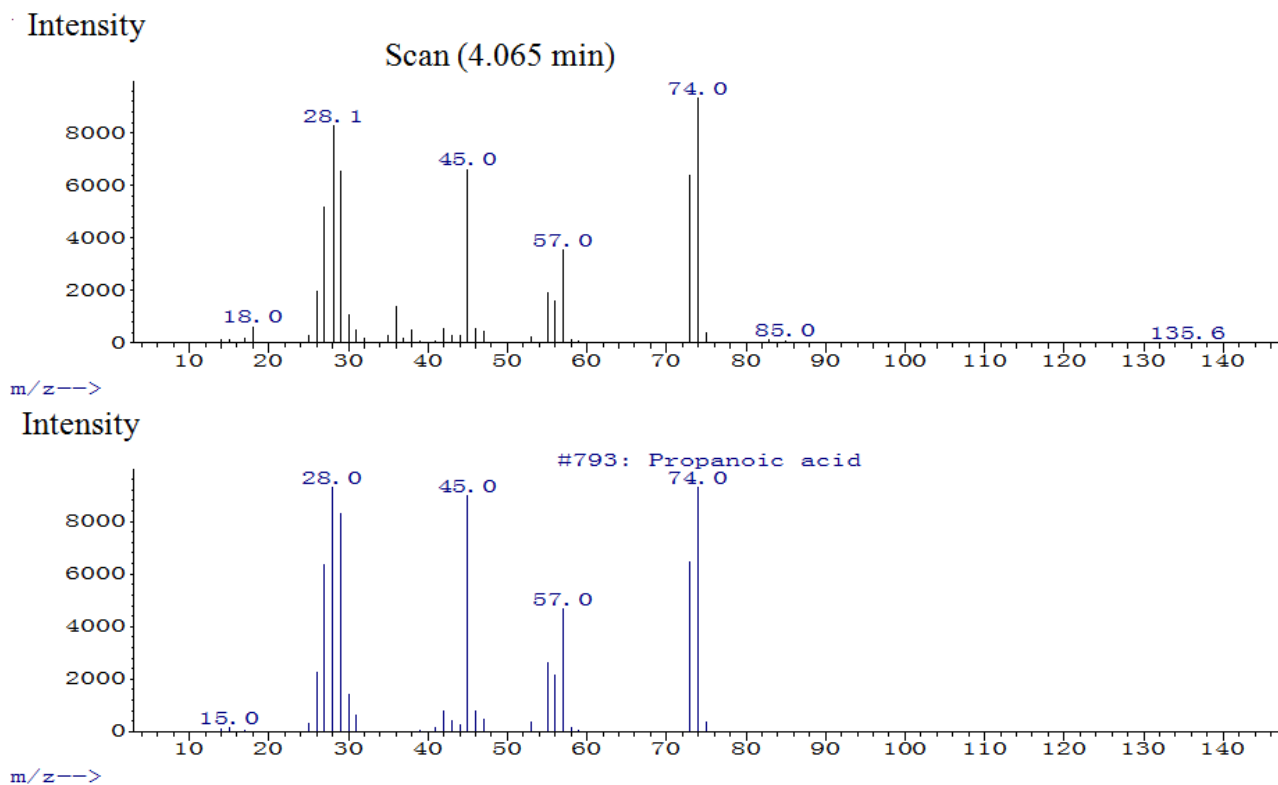

**Figure S5-3.** The Mass Spectra of propanoic acid in the permeate.

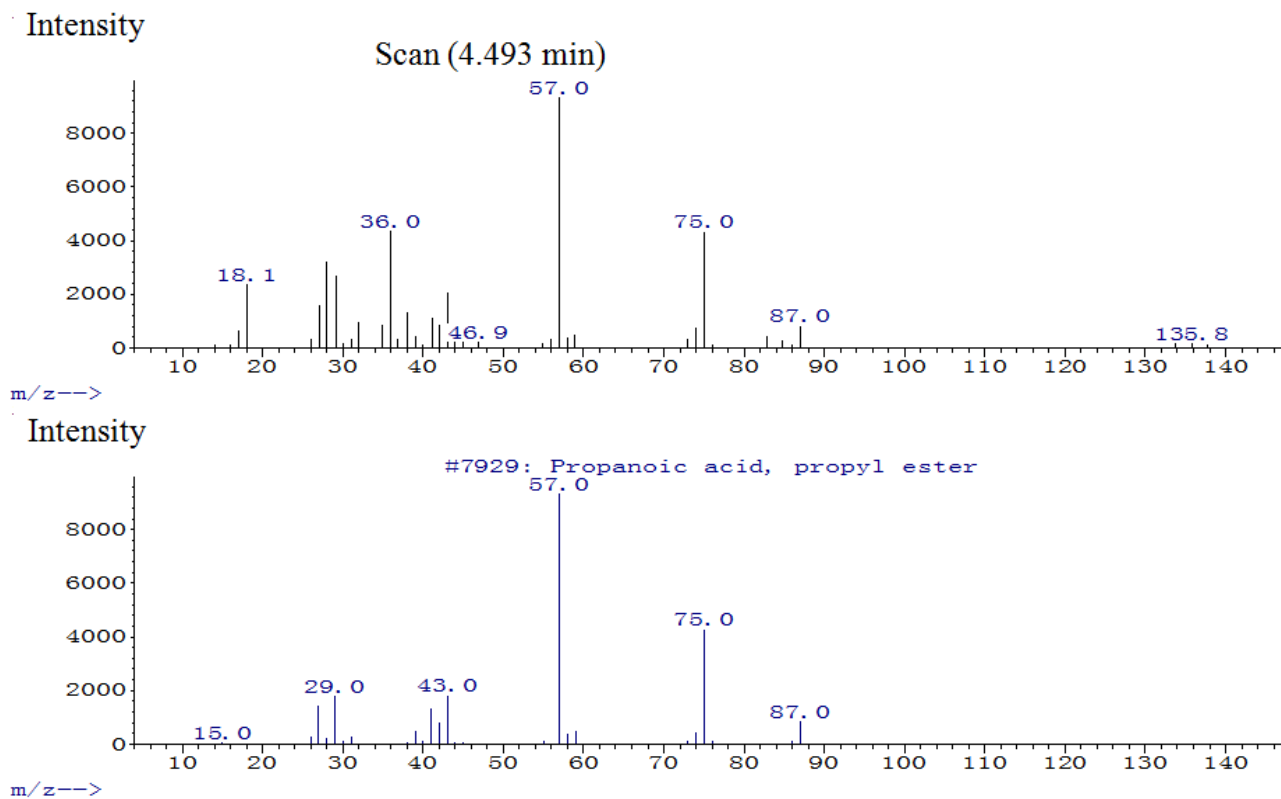

**Figure S5-4.** The Mass Spectra of propanoic acid, propyl ester in the permeate.

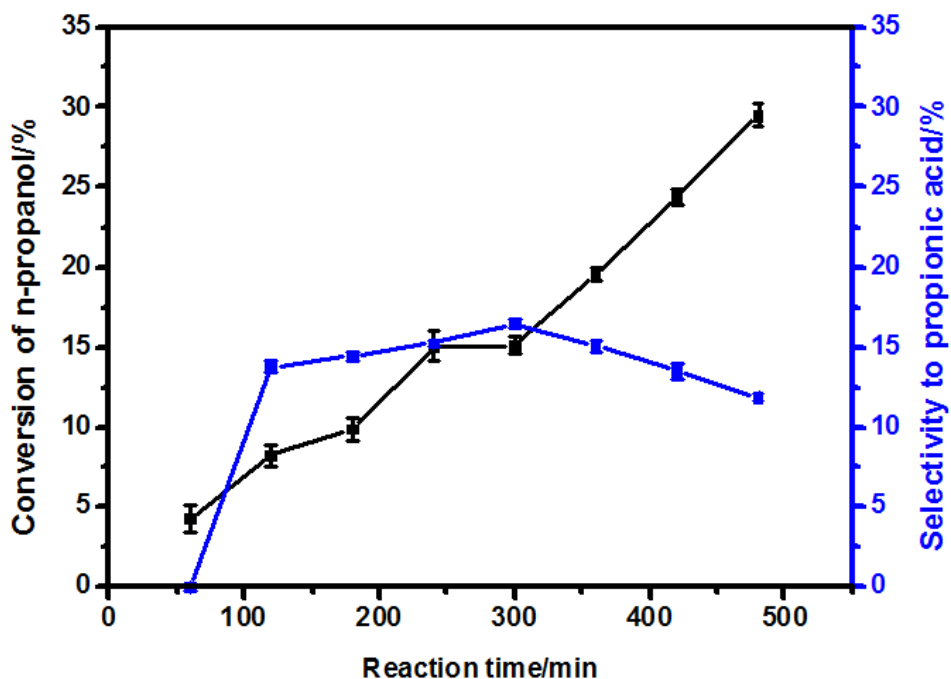

**Figure S6.** Conversion of n-propanol and selectivity to propionic acid versus reaction time in the reactor at the residence time of 0 min (namely a conventional electrocatalytic reactor with no permeate). The conversion of n-propanol increased from 4.31% to 29.5% with an increase in the reaction time from 0 to 480 min. The selectivity to propionic acid increased from 0 to 16.49% and then decreased to 11.88% during the reactor operation.



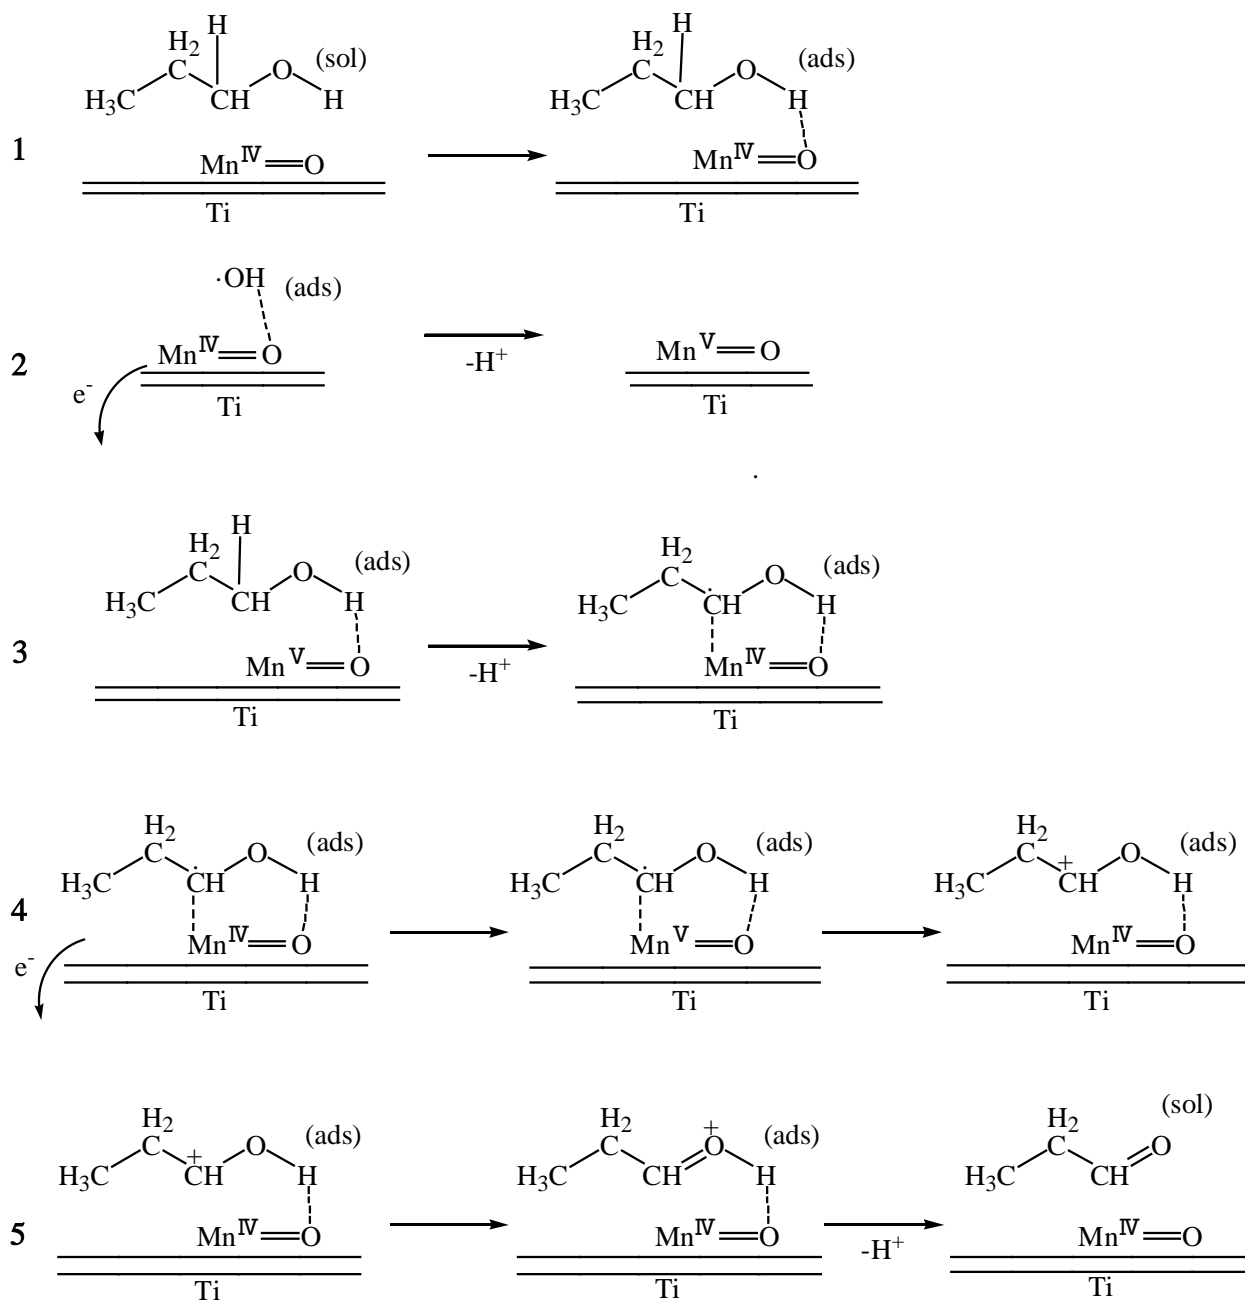

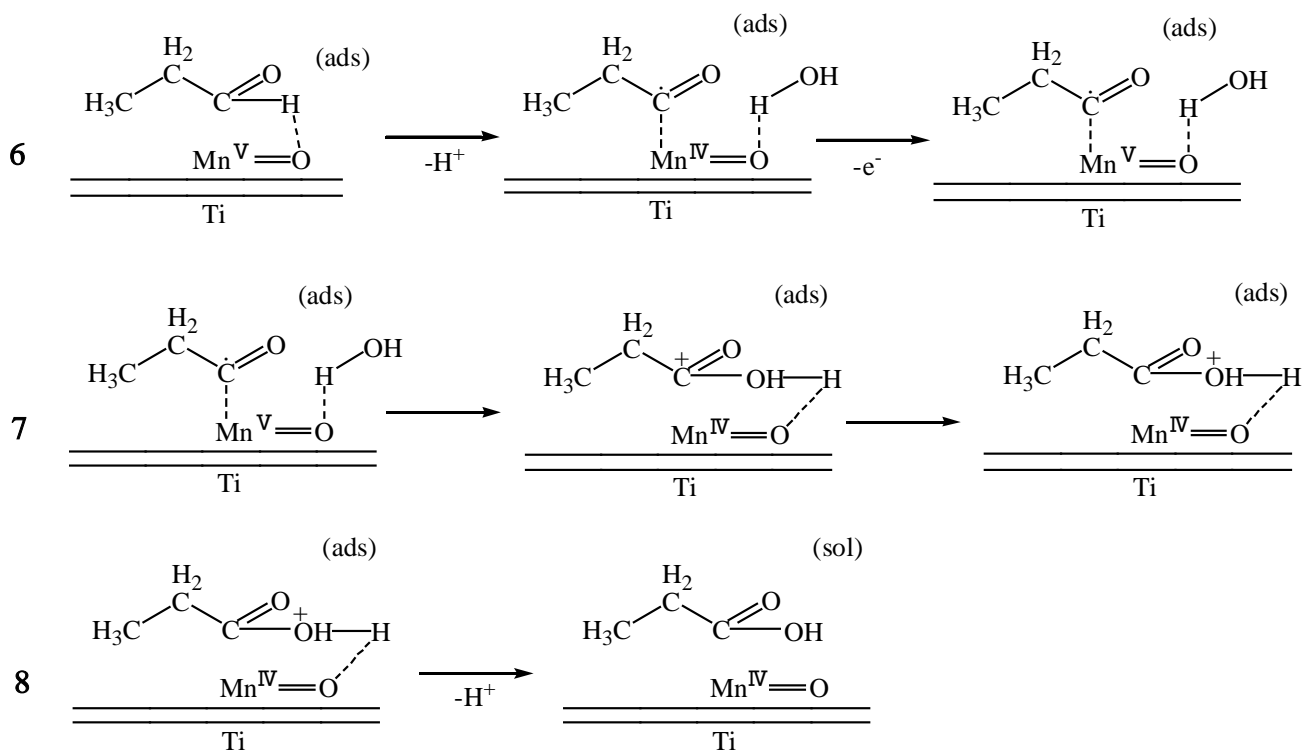

**Figure S7.** Proposed mechanism of electrochemical oxidation of n-propanol to produce propionic acid using  $\text{MnO}_2/\text{Ti}$  electrocatalytic membrane. Step 1 was the adsorption of n-propanol on the  $\text{MnO}_2/\text{Ti}$  electrocatalytic membrane surface. Step 2 was the oxidation of Mn (IV) to Mn (V) by hydroxyl radical. Steps 3 to 5 were the oxidation process of n-propanol to propanal through Mn (V) converted back to Mn (IV) by the redox reaction between Mn (V) and n-propanol. Steps 6 to 8 were the oxidation processes of propanal to propionic acid by means of the similar processes of the steps 3 to 5.

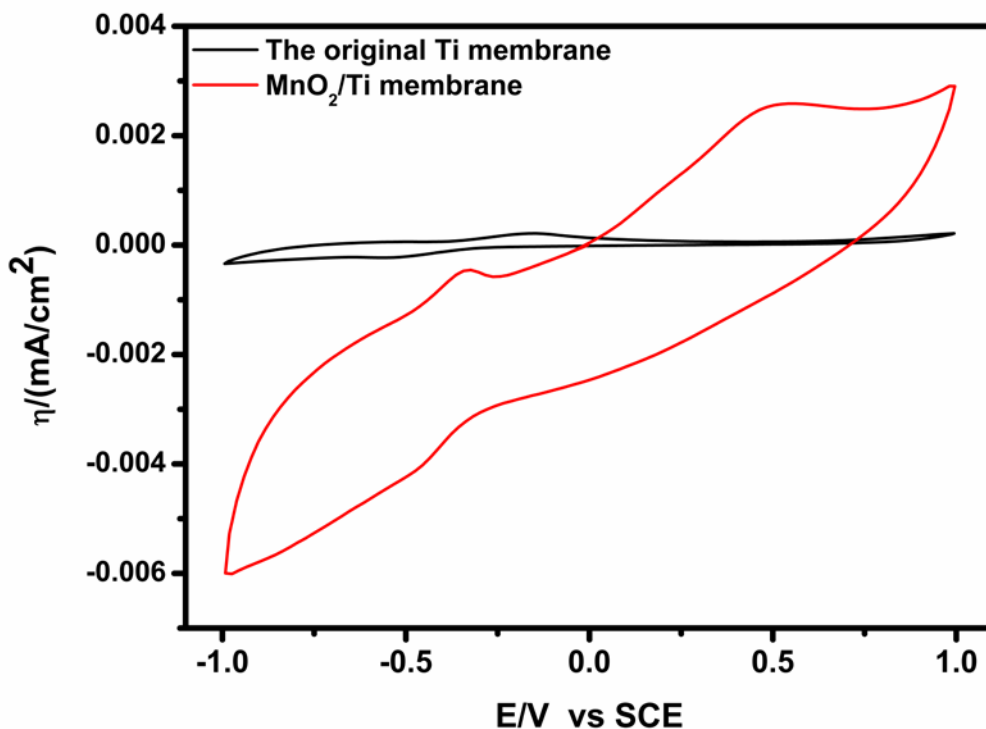

**Figure S8.** Cyclic voltammograms obtained in 0.1 M Na<sub>2</sub>SO<sub>4</sub> solution at different membranes. Scan rate: 1 mV·s<sup>-1</sup>. It is found from Figure S9 that the current magnitude of CV from MnO<sub>2</sub>/Ti membrane was much larger than that of the original titanium membrane. It implies that the MnO<sub>2</sub>/titanium membrane electrode possesses a fast electron transfer process in this system. The oxidation peak at 0.5 V may attributed to the oxidation of Mn (IV) to Mn (V).<sup>[S5]</sup> There was no similar peak in the CV obtained from the original Ti membrane.

## References:

- [S1] Kennepohl, D.; Sanford, E. *Energ. Fuel.* **1996**, *10*, 229.
- [S2] Furukawa, S.; Shishido, T.; Teramura, K.; Tanaka, T. *ACS Catal.* **2011**, *2*, 175.
- [S3] Feng, Q.; Huang, K.; Liu, S.; Wang, X. *Electrochim. Acta.* **2010**, *55*, 5741.
- [S4] a) Reddy, A. L. M.; Shaijumon, M. M.; Gowda, S. R.; Ajayan, P. M. *Nano Lett.* **2009**, *9*, 1002;  
b) Chen, W.-M.; Qie, L.; Shao, Q.-G.; Yuan, L.-X.; Zhang, W.-X.; Huang, Y.-H. *ACS Appl. Mater. Inter.* **2012**, *4*, 3047.
- [S5] Das, D.; Sen, P. K.; Das, K. *Electrochim. Acta.* **2008**, *54*, 289.
